# Supplementary material for: Measuring 3D Hand and Finger Kinematics—A Comparison between Inertial Sensing and an Opto-Electronic Marker System
Source: PLoS One. 2016 Nov 3;11(11):e0164889. doi: 10.1371/journal.pone.0164889 (PMC5094774; doi:10.1371/journal.pone.0164889)
Supplement: S1 File — (XLSX) [file pone.0164889.s001.xlsx]

## Sheet: flexion tasks
			dRMS [deg]				dRMS - offset [deg]				offset [deg]				dROM [deg]				ROM OT [deg]
Plane of movement	subject		MCP	PIP	DIP		MCP	PIP	DIP		MCP	PIP	DIP		MCP	PIP	DIP		MCP	PIP	DIP
Sagittal	1		3.1338	9.13152	4.77123		3.33275	4.07368	2.35838		-1.29131	-7.46273	-6.22997		8.83586	-4.36906	2.11886		52.9764	26.7039	9.08512
	1		2.84111	8.78609	4.47054		3.30336	3.66544	1.94042		-1.18231	-7.25954	-5.77201		7.20117	-3.88993	2.04113		50.6519	24.8	9.13368
	1		2.87997	9.46588	4.56887		3.17298	4.08976	1.4475		-0.929357	-7.11703	-4.6296		9.42343	-4.56733	3.40443		45.9755	24.204	7.38875
	1		0.753008	5.17493	6.56521		1.10888	1.45393	0.674621		-0.79195	-4.45671	-6.55094		0.128386	0.43252	2.64525		9.14329	23.8562	17.2438
	1		0.879951	6.15141	8.23736		1.01681	1.50672	0.718929		-0.316428	-5.42377	-7.84274		2.38593	-0.265146	2.9358		9.68011	26.2271	18.4502
	1		2.22491	6.09105	8.59054		1.45022	1.85091	1.10253		0.877223	-5.13388	-9.50407		3.2567	-2.61726	2.50283		15.6142	28.6393	18.1637
	1		3.98976	12.5016	3.16301		4.69361	8.07785	2.7821		-5.35023	-5.20955	-5.23078		9.00488	-12.4816	3.86856		49.2168	38.2652	14.8328
	1		4.47757	9.40255	4.22031		4.34912	4.66907	1.81649		-6.81957	-6.39075	-5.52279		8.11583	NaN	NaN		49.3403	NaN	NaN
	1		2.86481	11.0302	5.08608		3.12785	4.76388	1.33203		-3.32756	-7.46757	-5.76565		10.9217	NaN	NaN		37.5473	NaN	NaN
	1		5.62253	7.91422	4.48181		6.44794	5.5522	1.90398		-7.42638	-3.90177	-3.61297		15.6661	-13.7436	1.57519		55.3242	67.7819	18.238
	1		10.0086	3.30812	8.77395		2.99905	3.75674	2.55587		-9.41892	0.977924	-7.39192		5.83079	-6.72859	3.23654		11.4075	62.5559	60.4677
	1		7.10557	4.61617	12.2053		3.37398	4.47693	2.67568		-7.46126	-0.348953	-10.9836		10.0936	-9.76655	7.11653		15.0312	69.3264	60.4967
	1		7.99998	3.62356	2.32757		3.85371	3.85293	2.27268		4.96816	1.44532	-0.518489		6.43283	-4.8139	7.71444		22.875	60.694	55.1807
	1		6.2023	11.1565	10.0423		8.47597	10.534	2.55939		-4.34946	-0.879574	-8.0743		16.0448	-16.2326	0.778755		68.7831	94.6862	41.0161
	1		5.61671	13.2632	12.1744		7.0587	11.6692	2.10889		-4.84437	-2.08355	-11.2999		14.4976	-15.1754	6.65945		75.2251	93.0902	23.4786
	1		5.57687	8.92531	7.93294		8.32689	8.83686	2.22794		-9.49855	-0.140402	-8.27119		12.5152	-12.0501	2.92329		79.4572	95.7339	25.9858
	1		5.42531	8.86159	8.86717		5.32082	8.28796	3.16512		-4.32472	-1.18251	-8.48091		11.1355	-12.0992	21.6384		82.6121	97.1281	39.3152
	1		5.79478	15.1488	5.56272		7.1116	10.397	4.67579		-1.9699	-6.10507	-5.19357		11.2804	-11.973	11.6976		38.9021	97.4207	61.342
	1		7.25851	14.6188	6.00406		9.02763	11.488	3.81347		-2.28675	-3.93671	-4.59077		14.1058	-16.261	12.0815		41.2178	93.3596	42.9176
	1		6.28213	14.4846	5.74785		7.03152	10.1224	4.78006		-0.973487	-5.62863	-4.37867		12.2477	-15.0716	15.1769		42.7777	102.969	52.9107
	1		10.5066	16.3845	21.4188		8.35557	10.1348	7.32225		7.02624	-9.3112	-25.9059		19.0126	-12.5184	8.82855		72.3141	96.7142	47.5659
	1		9.48783	19.5164	16.61		7.83499	14.8422	6.06576		6.06359	-5.85638	-15.6157		26.1927	-18.3342	8.83668		65.7825	103.517	55.1961
	1		8.4276	14.3795	5.64357		15.6069	10.8113	4.51413		-13.9205	-5.23624	-2.40157		14.1156	-15.6371	8.74386		69.9957	105.555	49.134
	2		3.5187	6.47543	3.61267		2.98219	3.92868	1.36421		-4.13104	-3.13619	-3.87811		1.71435	-4.46866	NaN		58.2475	35.3138	NaN
	2		2.28589	5.89111	3.86255		2.24998	3.34867	1.41988		-0.183543	-3.37572	-2.86088		3.40638	-6.25758	NaN		51.399	36.4082	NaN
	2		2.4755	6.3577	4.31984		2.39098	3.89783	0.996527		0.649701	-2.96868	-4.2351		6.86233	-5.8869	NaN		46.7149	30.475	NaN
	2		4.03368	5.98638	NaN		3.15204	5.15803	NaN		3.11503	-1.46332	NaN		6.24639	6.35434	NaN		18.6181	98.8432	NaN
	2		3.46298	3.75696	NaN		2.68656	3.08537	NaN		2.21319	-1.03322	NaN		5.69702	3.8223	NaN		14.1517	97.6759	NaN
	2		6.46415	7.33723	3.64234		2.54763	4.81515	1.9818		6.15583	-3.08942	3.3141		5.35943	-6.71065	NaN		61.6657	37.3657	NaN
	2		7.26499	7.50336	3.72786		2.95486	5.35627	2.58917		6.68574	-2.66184	1.75381		6.41651	-8.0306	7.63723		61.0102	45.882	8.62283
	2		7.67311	8.27567	4.41593		3.40613	4.99601	2.6535		6.71742	-4.1978	2.62613		5.01631	-8.74286	NaN		58.7244	49.1734	NaN
	2		10.4272	4.36659	2.67821		4.17724	3.54167	2.70922		-12.6218	2.81605	-2.07446		5.39459	2.93601	4.43845		56.616	83.5085	18.9355
	2		9.33587	2.95545	1.92858		3.09327	3.78284	1.94462		-9.72742	2.23021	-0.155733		7.57892	-2.98321	5.36711		51.8019	50.4548	9.29989
	2		11.7912	4.33266	2.88052		5.05914	4.8938	3.27334		-13.9058	4.46249	-2.10951		11.4107	-1.27923	NaN		56.7689	62.3863	NaN
	2		2.74753	3.72261	2.85442		1.57312	1.86883	0.506927		2.14797	-3.23081	-2.74303		-0.677461	-0.316193	2.43402		31.3962	5.24768	1.43415
	2		3.40531	3.40975	2.80874		2.14203	1.9077	0.467173		-2.65196	-2.74935	-2.78414		2.37385	-1.45142	1.91999		28.4963	6.61448	1.80272
	2		4.15325	2.23161	3.64967		0.867348	0.402929	0.495231		3.82889	2.25605	-3.63041		1.50075	0.449125	1.76295		14.3477	9.97179	7.13621
	2		3.33228	4.60539	2.56699		1.33441	1.7669	0.612291		-3.09633	-4.78747	-2.61031		2.15118	0.901804	0.281329		43.6771	50.7542	13.3895
	3		NaN	1.15208	7.58595		1.81881	0.74363	0.684765		NaN	0.876566	-7.54341		3.94656	-2.13525	2.38435		8.19613	8.59763	6.02559
	3		NaN	1.78231	6.10341		1.34959	1.243	1.28093		NaN	-0.921597	-5.04397		-1.18815	1.74917			9.63342	21.3256
	3		3.96503	1.73701	5.56169		0.94473	1.46337	0.608493		-4.22336	-1.38463	-5.3492		2.79342	-1.84387	10.1829		15.7563	16.7675	7.42801
	3		NaN	9.46867	7.3045		NaN	4.3953	7.12042		NaN	-11.3758	-6.19109		NaN	1.25231	17.0403		NaN	70.6263	53.8652
	3		3.62812	9.94558	6.09706		6.31597	6.05358	6.36574		5.32317	-9.74505	-7.38761		7.72102	0.526913	18.3324		12.1632	61.095	44.0269
	3		NaN	10.6044	7.6806		NaN	4.31162	7.00673		1.81477	-8.17833	-5.10454		NaN	2.11145	13.785		NaN	66.143	49.2671
	3		NaN	3.03287	NaN		1.54698	4.53264	7.4853		-14.8019	2.04802	-13.3154		NaN	0.459835	NaN		NaN	64.1307	NaN
	3		3.82025	3.46831	NaN		1.88707	3.54046	4.25013		2.11302	0.092297	-13.8057		NaN	NaN	NaN		NaN	NaN	NaN
	3		NaN	NaN	NaN		NaN	NaN	NaN		NaN	NaN	NaN		NaN	NaN	NaN		NaN	NaN	NaN
	3		13.5596	9.37523	4.53436		13.6425	6.46863	4.49297		-1.59765	-4.30821	-0.545243		NaN	4.13098	20.1831		57.6365	77.2517	61.6182
	3		15.6781	13.4398	6.72562		5.07543	4.46374	3.2854		-18.6113	-11.0141	-4.76412		11.6263	-6.23857	7.48659		52.8492	74.1122	59.1037
	3		8.64849	10.2455	NaN		4.99533	5.59906	NaN		4.01731	-5.63373	NaN		NaN	NaN	NaN		NaN	NaN	NaN
	3		9.41228	7.3896	NaN		3.22337	7.34153	NaN		6.53126	-0.0612535	NaN		NaN	NaN	NaN		NaN	NaN	NaN
	3		3.63881	5.39633	6.51693		1.57275	4.64234	4.23843		2.54888	8.23121	-3.92287		0.76274	-5.2051	NaN		41.3267	73.5081
	3		2.97364	3.5479	5.46592		2.14846	3.51604	4.04647		1.03701	4.01254	-2.4983		3.35864	NaN	7.05836		33.4725	74.9108	43.7651
	3		2.5573	4.50181	5.89741		2.12676	2.78231	4.54662		0.541902	2.12839	-6.64178		3.51488	-5.26721	6.58114		38.799	68.647	47.7228
	median		4.95144	7.33723	5.56169		3.17298	4.46374	2.55587		-1.0779	-3.13619	-5.10454		6.64758	-4.56733	6.58114		45.9755	62.4711	25.9858
	standard deviation		3.32972	4.26079	3.66923		3.10215	3.20244	1.96936		6.2238	4.09617	4.86382		5.60164	6.39465	5.71171		21.3884	30.6831	20.9834
Frontal	1		4.39016	0.64521	3.58269		3.65428	1.02302	0.519839		-3.35012	1.08593	-3.3193		5.80834	-0.839629	-1.17045		10.1145	2.2608	2.12941
	1		4.31537	0.869422	3.41557		4.44241	0.653877	0.359142		-5.2421	0.425133	-3.29562		5.77143	-1.84224	-0.735295		8.87706	3.37269	1.71664
	1		4.56678	1.09722	3.4761		3.84813	0.740824	0.648109		-3.20723	0.773676	-3.91411		3.9014	-2.0535	-1.60613		8.84176	3.39871	2.28751
	1		0.979862	0.564653	2.55716		1.66536	0.497485	1.02981		0.965488	0.472948	-1.62278		2.10043	0.565255	-0.905004		7.1327	1.36433	1.81758
	1		0.841654	0.633143	0.549948		1.19319	1.40658	0.847899		0.490671	1.45619	0.77238		1.69382	-0.0410827	-0.898498		5.01517	2.25255	2.02276
	1		3.82891	0.935875	0.599195		0.806101	1.06608	1.52386		3.36424	1.37462	1.61871		-1.15174	-1.92976	-1.48456		14.2743	3.87909	2.49345
	1		5.91156	1.57856	2.19862		4.81715	1.33043	0.725548		-6.03856	1.79849	-2.32079		7.35972	-4.32054	-1.69058		8.85809	6.06	2.38088
	1		5.34603	1.39544	2.26247		5.7267	1.61825	0.587627		-7.32916	0.307547	-2.26151		4.09208	NaN	NaN		10.8298	NaN	NaN
	1		4.5298	1.38233	2.02531		4.30074	1.08066	0.627343		-5.21258	1.40933	-2.22265		8.24149	NaN	NaN		9.65669	NaN	NaN
	1		2.71608	1.27401	0.815064		2.94007	1.01732	0.831497		-3.51612	0.484167	0.0303209		3.92726	-3.88619	-0.176641		8.83469	6.8621	3.56261
	1		4.59622	1.03336	1.26079		2.43161	1.1269	0.747283		-2.50394	-0.299543	-1.42723		6.13381	1.44925	-2.4474		6.42681	2.76261	6.72463
	1		2.13589	1.40471	2.05774		2.2234	1.39701	2.462		0.289124	0.0113042	3.26507		1.7602	-0.0934237	-0.303386		7.45187	4.85781	5.08667
	1		3.4845	2.35725	7.83065		3.15891	1.13701	2.72339		0.660694	-1.93061	-8.79147		3.46906	2.35992	-6.82543		6.63506	2.43183	11.0473
	1		2.72855	2.87863	2.66739		1.35617	2.45111	2.41132		1.8354	-3.81428	-1.24996		4.67375	-6.26223	-3.44478		8.71078	10.3873	10.0782
	1		2.28833	1.52807	1.6996		1.12229	1.25283	1.83412		2.44243	0.572339	0.474695		2.77609	-1.67113	1.42524		8.19978	6.6631	6.31142
	1		2.61116	4.23452	2.1551		2.19968	1.76214	1.87628		0.544409	-3.84309	-0.479211		2.71892	-1.16928	0.385196		5.98301	6.90754	9.22987
	1		3.78414	3.2427	2.27086		3.44925	1.57358	1.88489		5.55621	-3.56341	-0.807555		2.89044	-4.58898	-0.476034		7.28609	9.57577	8.42942
	1		4.25949	2.88147	2.42117		6.45054	2.71296	2.28432		-7.32324	2.7428	-0.577397		1.23837	-7.4474	NaN		11.1671	11.7808	NaN
	1		4.27096	1.33065	2.37401		3.81325	1.28681	2.28236		-5.55032	-0.812562	-1.5669		1.88103	-4.52607	NaN		13.3408	9.49478	NaN
	1		4.82879	1.86669	4.52912		4.84719	1.69255	4.02276		-5.74115	-1.28836	-5.6453		2.68237	-12.9683	NaN		10.5627	17.7273	NaN
	1		4.26529	3.90489	4.30159		4.34131	1.89413	6.49799		-0.522651	2.70861	6.44757		-0.0332498	3.47144	0.311676		11.199	4.86097	8.61674
	1		5.38085	1.5966	4.09372		7.67574	1.58555	6.15649		-3.23417	0.0234419	2.74535		0.7735	2.06178	-0.839004		10.9942	4.98482	10.4884
	1		6.63341	1.70515	2.22019		5.84525	1.30914	2.68137		-1.59236	-1.07905	0.70883		10.6612	1.78974	-2.12185		10.8807	5.12444	7.44643
	2		4.31397	0.873412	5.04384		3.9219	0.47139	0.29013		-2.61069	0.770099	-5.03637		3.64654	0.943878	0.538268		8.27066	1.75202	1.00541
	2		10.1723	1.08096	5.13378		3.61916	0.509197	0.2801		-9.59715	0.991617	-5.1261		6.36648	1.83998	0.620533		6.63046	1.15562	0.774598
	2		1.90704	0.529088	4.05361		1.12165	0.345941	0.467062		1.22814	0.428814	-4.01694		1.56368	-0.789875	-1.50835		9.56288	1.52841	2.47898
	2		3.68619	2.4632	2.25134		2.50869	1.85963	0.863783		-2.95803	2.3914	-1.9333		5.34531	-4.6434	-3.33594		15.7595	8.21512	4.68127
	2		3.04807	1.09425	4.3816		3.71097	1.02583	0.30256		-1.03461	0.180988	-4.35995		1.45932	2.64177	NaN		10.6246	2.6689	NaN
	2		2.18987	0.790501	4.40796		2.30142	0.715795	0.368405		-0.315941	0.244759	-4.24978		-0.406674	1.08491	NaN		12.8402	2.9708	NaN
	2		2.12484	0.661081	4.52343		1.6519	0.763768	0.278063		1.34765	0.385897	-4.33104		1.193	1.34366	NaN		7.4081	2.05856	NaN
	2		3.64645	2.32996	NaN		2.62706	2.19875	NaN		3.21308	0.851931	NaN		6.68594	-6.12866	NaN		6.29971	9.30128	NaN
	2		3.38398	1.58901	NaN		1.88111	1.56319	NaN		2.79593	0.553948	NaN		7.86679	-2.12991	NaN		6.96264	6.48315	NaN
	2		3.81314	0.960814	6.36092		2.79035	1.17081	1.11947		-2.38007	-0.486913	-6.23131		1.89794	-4.27626	-4.75412		15.9388	7.6024	6.54708
	2		2.59623	1.03935	5.92387		2.56554	0.884009	1.99374		-0.14908	-0.522578	-6.78769		2.85171	-0.450551	-5.3213		13.8154	3.92824	7.21299
	2		4.74786	1.27974	5.29174		1.95156	0.972382	1.96174		-4.50873	-0.687137	-5.58152		2.94731	-1.44077	NaN		12.2965	4.20542	NaN
	2		2.5833	2.366	3.89373		2.97351	2.34203	2.54452		3.61839	-0.380876	-4.50239		3.87092	-11.1185	-4.31926		10.0465	15.5545	10.8965
	2		2.16828	1.21634	4.16571		2.53997	1.16885	1.77938		2.34396	-0.105942	-4.73985		4.03656	-4.62313	-5.64192		11.2069	7.37226	7.11953
	2		3.99781	2.76687	3.02658		3.79655	2.86593	3.57385		-0.300162	-4.45061	-4.43477		4.00722	-3.82105	NaN		11.0713	8.00548	NaN
	3		NaN	2.37471	2.307		0.682711	0.255409	0.375057		NaN	2.35317	2.2729		1.59979	0.140392	-0.89222		3.54882	1.39329	1.7256
	3		NaN	1.93898	1.87948		0.839496	0.842688	0.313372		NaN	1.52081	1.83923		2.86305	-1.24076	NaN		4.85125	2.91704	NaN
	3		2.95934	2.28829	2.2875		1.00843	0.786398	0.432023		-3.09566	2.22955	2.23003		3.43576	-1.79318	-0.807491		8.93814	3.16578	1.98853
	3		NaN	2.75034	1.29816		NaN	1.60119	1.88154		NaN	2.00072	2.2304		NaN	-1.87924	-1.44506		NaN	7.20845	4.51528
	3		3.71654	2.48875	0.836892		1.87353	1.3732	1.01282		-2.05011	1.78945	1.09721		2.894	0.0584593	-1.00807		4.20085	4.55594	2.98548
	3		4.06309	2.89626	1.18679		3.86125	1.51833	0.995844		-3.1297	2.54588	0.691703		11.6708	-0.715378	-2.8442		4.6747	5.29881	5.29172
	3		NaN	1.81974	NaN		1.94519	1.77488	1.31879		-9.3326	0.452612	2.16613		NaN	0.0617484	NaN		NaN	7.97298	NaN
	3		4.01973	1.85776	NaN		4.32981	1.85769	1.07757		-1.63158	-0.0196619	0.200467		NaN	NaN	NaN		NaN	NaN	NaN
	3		2.28208	NaN	NaN		3.48322	NaN	NaN		2.60866	NaN	NaN		NaN	NaN	NaN		NaN	NaN	NaN
	3		3.93201	1.86271	2.11586		3.77722	2.42171	3.30155		1.17239	1.02951	2.72585		NaN	1.31406	-5.97828		11.001	5.24886	12.5257
	3		2.79319	1.80814	5.37659		3.08758	1.62011	2.8027		1.27198	-1.12826	5.01519		5.87676	1.52947	-6.91225		8.79328	5.70992	12.9139
	3		3.21534	3.81138	NaN		2.97206	3.55217	NaN		3.5734	4.80437	NaN		NaN	NaN	NaN		NaN	NaN	NaN
	3		6.19792	3.38085	NaN		2.37943	3.79867	NaN		6.90751	4.93814	NaN		NaN	NaN	NaN		NaN	NaN	NaN
	3		4.31795	3.58379	4.38711		3.7764	1.66203	4.65636		6.83453	-3.10848	-0.84139		4.81638	-3.16374	NaN		4.17447	10.622	NaN
	3		3.5212	2.42469	4.61656		2.65326	3.37709	6.05034		4.78627	2.52306	-3.12999		3.30997	-3.5611	NaN		4.03789	10.9878	NaN
	3		3.5754	2.15195	4.39063		2.75916	2.26324	3.59008		4.93943	-2.18598	3.03934		0.00457207	-3.32867	NaN		6.98787	10.3304	NaN
	median		3.75034	1.70515	2.66739		2.94007	1.3732	1.31879		-0.315941	0.452612	-1.42723		3.30997	-1.34076	-1.44506		8.84992	5.18665	5.08667
	standard deviation		1.53031	0.941377	1.64465		1.47695	0.787929	1.58419		3.97331	1.94397	3.32795		2.68002	3.36697	2.24051		3.05494	3.70537	3.64508
Transversal	1		2.25968	1.03089	0.478601		4.57109	2.45758	0.370865		5.66866	2.57008	-0.187764		8.4197	-1.15872	1.49545		1.37336	3.78812	0.587262
	1		1.9095	1.1931	0.427957		5.11004	1.58125	0.305503		5.43825	2.10191	-0.220914		7.10169	-0.339769	1.44592		1.28376	2.60954	0.579779
	1		2.2814	1.13889	0.545967		6.0864	1.48338	0.401237		7.12327	1.75988	-0.463746		8.00317	-0.240236	1.57125		1.0342	2.89245	0.594862
	1		2.04212	1.28316	1.11596		3.52815	1.50644	0.795554		4.08633	2.3604	-0.396331		5.31456	-1.42659	1.2789		0.328946	2.30244	1.72307
	1		1.19247	0.703757	0.620812		2.19135	1.42984	0.643049		2.79632	1.75497	0.129492		3.37426	-1.21624	2.40383		0.280195	2.13904	0.943192
	1		1.67919	1.24656	0.574397		3.75246	2.1516	0.831875		4.49607	2.74224	0.562572		5.80978	-4.38104	1.31163		1.14899	5.17304	1.65675
	1		2.09611	1.21782	1.22649		4.25661	1.44995	1.26283		3.93153	1.30661	0.0461766		9.5499	-1.1772	0.435143		1.00694	4.7133	2.65021
	1		2.06518	1.26304	1.1682		2.71487	1.74242	1.15713		2.99804	0.692239	-0.0141895		11.9473	NaN	NaN		0.79201	NaN	NaN
	1		4.32848	1.4449	1.18557		2.88492	1.17111	1.02059		2.91043	1.11431	-0.235307		12.8098	NaN	NaN		0.578339	NaN	NaN
	1		2.51167	2.11188	0.802159		1.6924	1.74162	0.961095		1.46232	1.99643	0.944836		6.77348	-4.24401	3.70387		2.82322	7.27925	1.14983
	1		1.97358	0.785584	1.53996		2.16495	0.647284	1.60661		0.426381	0.379172	0.75644		6.41131	-2.49484	1.8604		0.646814	4.86981	3.62213
	1		2.90272	1.10344	1.77227		4.83908	0.893087	1.79013		2.50641	0.903888	0.033197		8.31198	-3.29258	1.85273		0.753269	4.75357	4.5423
	1		2.73214	2.64355	2.22821		1.03001	0.379844	1.48919		-2.12312	-2.60684	-2.43121		1.41854	-2.42744	3.40111		6.54322	3.4385	3.41681
	1		1.66642	1.48937	1.63148		3.46341	1.65626	1.66239		-2.21427	2.12573	-0.774715		5.50918	-3.26916	5.25082		1.89416	6.79327	4.50419
	1		1.4649	2.33108	1.45716		1.65702	1.85478	1.60512		-0.319165	-2.75154	-0.559244		4.36853	-2.37795	7.13862		2.3585	5.8821	2.7814
	1		3.42404	4.53326	1.07519		3.17794	5.32602	1.04684		4.76047	1.63959	0.139152		8.90062	-7.40038	4.78503		1.08657	10.7894	3.43855
	1		3.01216	2.90997	1.41235		3.20241	3.69255	1.39651		5.02437	2.20327	-0.150038		7.95025	-3.14397	5.45986		1.88886	8.34025	5.85337
	1		2.19774	2.47721	1.92771		2.9364	1.32705	2.00438		1.7417	2.61578	0.203729		10.8956	-2.86206	1.8647		1.59401	5.62037	6.2627
	1		1.70386	1.89996	1.64783		2.91575	1.62693	1.71134		2.45759	1.832	0.516712		9.03948	-6.72876	3.49122		1.15187	10.1674	4.87346
	1		1.93797	1.93365	1.66857		2.19174	1.20406	1.78381		0.625392	2.37235	0.669021		9.36302	-1.32989	0.0413843		1.83101	4.36902	9.73984
	1		5.42653	2.42853	6.36466		6.56034	3.258	1.97114		-1.79633	3.9732	7.40516		1.77854	0.515188	-1.03679		12.0147	7.36704	8.9405
	1		5.26277	1.66367	3.32147		5.7581	1.82588	2.74821		-0.705429	0.279491	4.71057		4.58662	2.42012	-0.832219		8.30292	5.63258	8.9476
	1		1.43424	0.723555	1.90206		2.36581	0.787409	1.77971		-1.78989	-0.203884	0.830595		1.49212	-1.81436	2.25297		8.32797	4.10154	7.86083
	2		3.52551	2.22498	1.26569		2.41867	0.937908	0.5726		-1.61689	-2.31547	-1.05873		10.695	-0.11237	NaN		3.29206	3.84681	NaN
	2		4.09751	1.88785	0.99144		4.48103	0.943584	0.582555		0.553777	-2.2187	-0.812632		8.36294	-0.536085	NaN		3.06017	4.08494	NaN
	2		3.20186	1.41946	0.856681		2.4197	1.36503	0.434278		-2.11653	-2.3859	-0.8439		7.23325	-0.399173	NaN		1.96056	2.76087	NaN
	2		6.65045	5.83703	NaN		6.39957	2.19502	NaN		-1.63452	-5.25726	NaN		15.4564	-6.58917	NaN		2.0715	10.9953	NaN
	2		7.02175	4.54294	NaN		6.56258	1.63184	NaN		-2.74056	-3.99494	NaN		14.4421	-3.71744	NaN		2.40564	9.39309	NaN
	2		3.01418	1.07189	0.987105		3.02747	0.791569	0.845297		0.366308	-0.494767	-0.457945		9.33433	1.67458	-1.8476		2.23135	2.29267	5.44478
	2		2.907	1.62965	0.807247		3.0104	0.802394	0.746716		-0.894877	-1.10098	-0.674084		11.1986	-0.180325	1.96138		2.14934	3.33354	1.68223
	2		3.66561	1.55911	0.777303		3.65518	0.982377	0.704785		0.135515	-1.72658	-0.488787		15.7087	-0.515907	-0.629257		2.62361	3.40311	4.17858
	2		3.09987	3.69071	1.83373		3.32958	2.19107	1.43051		0.526747	-3.63236	-2.20831		0.51405	-8.74233	2.54927		11.3648	13.3172	4.62982
	2		2.99531	1.66418	1.56786		4.62465	1.11326	1.10087		2.2721	-2.01416	-2.05004		2.52313	-2.57948	0.278398		9.5093	5.24916	2.8727
	2		2.72252	2.75245	1.06553		2.19608	1.72588	1.28582		-1.38461	-3.75025	-1.78448		5.69816	1.12934	NaN		8.45164	3.86897	NaN
	2		2.81934	2.66064	0.596692		2.73613	0.880934	0.370055		-0.587418	-2.5023	-0.529218		5.33443	4.98992	0.557784		2.11921	1.35199	0.698333
	2		2.54164	2.53085	0.495652		1.96988	0.819521	0.364825		1.63303	-2.40354	-0.316307		4.86528	3.80058	0.13987		1.54029	1.33273	1.00472
	2		5.01757	1.23343	1.34203		0.523355	0.453697	0.742095		-5.01271	-1.11176	1.13987		-0.500353	-0.993079	-2.3746		2.98099	2.7483	3.15051
	2		5.9547	2.02239	1.2038		3.55188	1.18534	0.452913		5.25828	-1.15905	1.22378		10.0498	-3.03037	-1.1141		4.0947	6.13988	2.6205
	3		NaN	0.95392	2.09835		0.778249	0.23623	0.239025		NaN	-0.918937	-2.07967		3.12979	0.81212	-0.0589261		0.472031	0.354878	1.1729
	3		NaN	0.736378	1.91036		2.15925	0.323678	0.452758		NaN	-0.540151	-1.87522		7.55851	1.10841			0.616036	0.556092	NaN
	3		8.90146	0.573565	1.48746		2.24165	0.207842	0.47454		8.10844	-0.528563	-1.47614		7.78673	0.162233	-0.400612		1.43777	1.06459	2.13219
	3		NaN	1.36053	1.68692		NaN	0.923081	1.29696		NaN	0.622921	-1.29791		NaN	-1.22883	2.76917		NaN	3.10155	2.87543
	3		7.18366	0.762116	1.04281		2.2919	0.916719	1.04789		5.90283	-0.980943	0.0324146		8.77227	-0.210223	3.46181		0.717406	1.8192	1.54286
	3		6.47474	0.820441	1.25983		3.7374	0.808451	1.14628		6.63462	-0.970547	-0.424824		14.0173	-0.647501	3.60075		0.958334	2.44351	1.63057
	3		NaN	1.11265	NaN		4.77663	0.790687	1.05823		0.813077	-0.629405	-0.704404		NaN	-1.05551	NaN		NaN	4.18418	NaN
	3		7.89524	0.91942	NaN		6.98376	0.722992	0.874674		11.8203	-0.57683	-1.95682		NaN	NaN	NaN		NaN	NaN	NaN
	3		0.63426	NaN	NaN		0.930639	NaN	NaN		-0.791277	NaN	NaN		NaN	NaN	NaN		NaN	NaN	NaN
	3		2.1162	1.8418	3.85716		1.99381	1.24591	2.09874		0.931302	-1.36472	-3.23342		NaN	-3.20847	-1.14455		1.89249	6.24713	8.72601
	3		2.41199	1.73715	2.70942		2.42181	1.55006	1.69055		0.179457	-0.773376	-2.14911		9.56605	-1.99377	2.08124		1.93077	6.78642	5.15121
	3		2.74011	2.19691	NaN		1.98318	1.68406	NaN		2.95985	-3.14434	NaN		NaN	NaN	NaN		NaN	NaN	NaN
	3		3.26194	1.17161	NaN		2.45052	0.537817	NaN		4.56876	-0.829464	NaN		NaN	NaN	NaN		NaN	NaN	NaN
	3		7.15309	1.9375	3.52915		2.3852	1.94706	3.59271		-5.11427	-0.210711	-3.79835		5.84038	-4.17068	-4.8345		1.26547	8.29435	NaN
	3		8.03424	5.31497	3.77973		1.43839	6.31245	3.64927		-7.30035	-1.54564	-3.76646		5.18729	-10.9208	-4.19502		1.05719	14.8666	10.4859
	3		9.0949	1.47119	3.4255		1.41692	1.52235	4.06778		-9.32903	0.170797	-3.46239		6.06652	-2.71068	NaN		0.92228	6.81315	NaN
	median		2.90486	1.55911	1.34203		2.88492	1.32705	1.05823		0.813077	-0.540151	-0.457945		7.55851	-1.27936	1.49545		1.85994	4.2766	3.01297
	standard deviation		2.17828	1.14273	1.12419		1.57082	1.10744	0.861255		3.89203	2.06236	1.86563		3.81997	2.94596	2.50706		2.91636	3.22981	2.81962

## Sheet: fast tasks
			dRMS [deg]				dRMS - offset [deg]				offset [deg]				dROM [deg]				ROM OT [deg]
Plane of movement	subject		MCP	PIP	DIP		MCP	PIP	DIP		MCP	PIP	DIP		MCP	PIP	DIP		MCP	PIP	DIP
Sagittal	1		6.50345	15.4089	4.16225		6.47126	4.20516	4.0654		-0.123099	-14.3129	1.04555		NaN	NaN	NaN		NaN	NaN	NaN
	1		16.3228	15.4856	7.65273		8.23737	10.8582	6.63352		-18.4781	-21.3195	-2.78311		NaN	NaN	NaN		NaN	NaN	NaN
	1		11.7729	6.44872	6.9172		10.7121	13.3701	5.10377		9.38906	8.3106	-2.03111		NaN	NaN	NaN		NaN	NaN	NaN
	1		8.08959	15.4515	8.9102		7.82177	13.7151	5.6426		2.05917	-2.12325	-3.6423		NaN	NaN	NaN		NaN	NaN	NaN
	1		9.12334	16.1333			11.4401	13.2447	NaN		-3.20392	-3.96097	NaN		16.7035	-17.8486	NaN		61.1608	103.87	NaN
	1		12.1292	17.1524	13.0542		11.1246	12.9257	5.84818		5.56169	-5.75263	-12.6607		29.7485	-9.56339	11.5627		84.536	100.531	23.2861
	2		10.1229	14.2849	8.05737		8.80571	4.63824	8.09494		3.92056	-11.6497	-0.0485379		NaN	NaN	NaN		NaN	NaN	NaN
	2		8.70496	7.67473	6.18379		5.60038	6.94139	6.02453		4.15354	-1.33745	0.245565		6.61679	-15.644	10.6593		74.9959	47.5467	24.7519
	2		4.22692	8.96631	7.66781		4.99548	7.91415	7.08333		3.33613	-1.6024	0.878449		7.74307	-8.77319	11.5619		74.2855	47.1175	27.1491
	2		4.50824	7.71267	3.96417		3.35674	3.73117	3.78965		1.85635	-5.48662	0.427349		5.30204	-2.60379	NaN		50.4382	72.2538	NaN
	2		6.83453	4.63274	4.01623		4.66874	4.60758	3.59599		5.03374	0.385887	-1.95385		13.3032	-0.557664	13.0785		58.3433	78.5381	38.6401
	3		9.33133	4.12969	21.3635		4.15647	4.20191	6.37814		-10.0162	0.434291	23.0441		5.27918	NaN	NaN		28.8312	NaN	NaN
	3		6.75353	4.23181	9.29669		5.03282	6.57494	8.48495		3.03907	6.07512	-7.64663		11.4944	-8.63959	15.3006		75.2778	79.826	64.9337
	3		7.36516	5.46331	11.9964		7.37899	7.46691	8.32393		0.0226802	6.28682	5.96938		8.61509	1.60967	8.4093		74.6734	86.8953	73.928
	3		7.00752	8.23907	NaN		4.55966	8.49352			-3.32356	0.440147			6.18248	NaN	NaN		69.3471	NaN	NaN
	3		9.19715	6.43484	6.66533		4.31258	8.301	6.22631		-5.7107	4.43888	-2.54816		8.3191	NaN	NaN		81.3857	NaN	NaN
	3		8.83968	6.06679	5.13957		4.12351	5.64323	6.08338		-8.93176	-0.874634	-2.79374		NaN	NaN	NaN			NaN	NaN
	3		4.17001	4.93806	NaN		4.70043	5.04067	NaN		-0.837034	5.20085	NaN		5.89338	NaN	NaN		58.6241	NaN	NaN
	3		2.59634	3.98901	9.61549		2.59649	4.29409	4.83677		-0.000407253	3.58065	-8.34953		3.19628	-4.88482	-6.28209		68.6339	80.6696	55.5728
	3		11.0986	6.51643	10.3624		5.19701	8.61758	6.22294		8.87972	6.37781	-8.18339		15.763	-10.5692	17.6921		84.8931	102.441	48.6145
	median		8.39728	7.09558	7.66781		5.11491	7.20415	6.08338		0.939513	-0.244373	-2.03111		8.03109	-8.70639	11.5623		71.8163	80.2478	43.6273
	standard deviation		3.21242	4.7101	4.23943		2.63182	3.41932	1.4683		6.72608	7.58717	7.6708		6.92503	6.24853	7.26245		15.1749	20.384	19.2665
Frontal	1		2.05985	5.19936	5.32206		2.25587	1.80366	1.69764		1.31842	5.20976	-4.95874		NaN	NaN	NaN		NaN	NaN	NaN
	1		2.17286	3.30113	6.62116		2.16912	3.02841	5.10198		-0.0453515	-1.35961	-4.18522		NaN	NaN	NaN		NaN	NaN	NaN
	1		2.27522	1.63797	5.48929		2.08025	1.52262	2.44969		-0.820345	0.230773	-5.1219		NaN	NaN	NaN		NaN	NaN	NaN
	1		2.59698	2.54826	8.49436		2.98798	3.4809	3.28669		-3.08867	-2.55329	-8.26504		NaN	NaN	NaN		NaN	NaN	NaN
	1		2.84102	1.90502	3.57149		3.65487	1.91946	3.57826		4.61203	-0.187895	-0.139938		NaN	NaN	NaN		15.7173	17.9893	40.8291
	1		3.92836	3.28906	2.2496		2.27602	2.15008	2.19088		3.19346	2.52489	-0.53888		3.45858	-7.62585	-14.4961		17.9271	14.2892	22.1291
	2		5.79662	3.17166	1.42353		2.42992	3.22177	2.19102		5.95574	-0.0759183	-1.22877		NaN	NaN	NaN		NaN	NaN	NaN
	2		4.06498	4.41962	1.7593		4.28982	2.79376	1.79291		-3.59176	-5.20632	0.254554		1.81585	-4.12072	-6.31594		10.2038	11.793	10.2336
	2		2.81729	2.48587	2.48915		3.38655	3.36583	2.30626		-1.11255	-1.83502	-0.847499		2.22916	-4.76044	-5.74441		11.4874	12.3929	10.4828
	2		6.30508	3.44441	2.23813		1.71346	4.04064	2.53525		5.39004	-4.95651	0.381673		-0.140573	-15.4793	NaN		13.2782	20.2826	NaN
	2		3.23558	3.64836	1.46737		1.56842	3.46788	1.46908		2.85082	-1.03418	-0.0954288		0.797552	-9.48562	-2.27886		9.31678	15.8343	6.49067
	3		1.22246	3.03061	8.08435		1.20733	2.48314	6.01858		0.0505546	1.70274	-4.10934		-4.08489	NaN	NaN		8.46892	NaN	NaN
	3		6.86737	2.91535	6.87371		5.25319	3.38093	5.0029		2.60472	-0.63984	-3.40156		4.34977	4.49827	1.44883		19.0973	8.62936	16.9661
	3		5.19195	2.6057	4.94227		5.13369	2.59642	4.38962		0.609195	0.135645	2.09017		6.45383	5.55365	-1.66213		12.6725	7.17498	11.2573
	3		4.05541	3.62909	NaN		5.36137	3.20125	NaN		-2.43461	4.06911			8.56247	NaN	NaN		17.2736	NaN	NaN
	3		4.11379	2.63785	2.55515		5.84522	2.32967	2.50729		6.91233	-0.750872	0.733124		1.97236	NaN	NaN		13.8724	NaN	NaN
	3		3.50921	2.1774	3.03436		4.0707	2.41835	3.03597		4.02413	0.837181	0.299368		NaN	NaN	NaN		NaN	NaN	NaN
	3		9.0516	4.31978	NaN		7.12332	5.02071			13.6604	2.41861	NaN		3.44413		NaN		14.8935		NaN
	3		8.77132	5.50626	3.96237		3.6864	7.34899	3.50454		10.4754	2.81812	3.74878		3.8753	-4.52793	NaN		15.7011	14.672	NaN
	3		9.96936	2.72036	2.90991		6.38545	2.71146	3.97913		14.1154	-0.0179509	3.73452		-0.782806	-5.30302	NaN		29.1454	19.083	NaN
	median		3.99189	3.10113	3.30293		3.52071	2.91109	2.78561		2.72777	-0.0469346	-0.339409		2.22916	-4.76044	-4.01164		14.3829	14.4806	11.2573
	standard deviation		2.50864	1.01593	2.27076		1.7349	1.2873	1.29797		5.09739	2.64517	3.2068		3.21863	6.50011	5.52169		5.2	4.31461	11.7315
Transversal	1		2.24586	2.44737	1.77486		1.8756	1.88585	1.53816		-1.548	-1.23729	-0.918459		NaN	NaN	NaN		NaN	NaN	NaN
	1		4.25025	4.68427	4.42392		3.46723	2.37835	2.4107		2.49294	4.86768	3.13397		NaN	NaN	NaN		NaN	NaN	NaN
	1		3.1829	0.843525	2.04279		2.19707	0.939034	2.06752		2.17682	-0.489756	0.258514		NaN	NaN	NaN		NaN	NaN	NaN
	1		3.51124	3.79058	2.17901		2.03214	3.13844	1.78934		2.63075	0.848677	1.81657		NaN	NaN	NaN		NaN	NaN	NaN
	1		3.51695	2.23059	2.19558		2.14439	1.78263	2.32476		2.96797	1.80186	-0.29992		NaN	-2.86986	-9.21171		2.48727	8.70666	18.1359
	1		3.42379	1.75836	1.40972		2.14511	1.77568	1.32631		2.72599	0.343248	0.611555		4.41339	-4.42087	4.37733		6.0099	9.89854	3.25236
	2		2.9689	5.1306	0.765387		3.19676	3.49592	0.777284		-4.17972	-2.18264	0.0463499		NaN	NaN	NaN		NaN	NaN	NaN
	2		6.37533	2.60468	2.02136		3.17413	3.47349	1.96197		-7.38352	-3.72307	-2.81472		3.74931	-10.0046	NaN		7.53138	16.1551	NaN
	2		4.06491	4.62567	3.49453		3.77065	7.00866	3.51533		-1.76299	-10.3873	-6.26058		-5.95964	NaN	NaN		16.4883	NaN	NaN
	2		4.38139	2.81868	2.76647		2.14291	2.43018	1.93969		-3.30023	-4.06213	-4.2215		5.09598	-4.31209	-3.94828		3.90857	9.75039	8.68209
	2		4.62986	3.02547	1.8192		2.96683	2.00711	1.18739		-3.6234	-2.1914	-1.30347		10.2197	-2.4708	-2.46785		2.7854	9.04089	7.25654
	3		1.53979	2.20884	12.9769		1.62222	1.79575	3.80749		-1.45999	1.00522	-14.4316		-5.68433	NaN	NaN		9.72577	NaN	NaN
	3		8.33463	5.78474	7.71542		6.12875	5.73703	4.90925		-11.8086	-1.59376	-6.38506		16.6643	-7.11819	11.9302		4.81527	17.3088	14.6874
	3		8.3869	2.69139	4.98834		5.70044	2.70856	3.65426		-3.89392	-0.253577	3.56731		23.0166	-2.76108	0.129207		3.89145	11.6644	16.1179
	3		6.2114	6.15797	NaN		3.18476	5.2357	NaN		-4.76483	6.45399			2.5207	2.33314	NaN		14.5789	8.26774	NaN
	3		6.72803	3.60821	1.61023		6.1437	3.47329	1.45099		-10.7811	2.03933	0.282742		16.1308	-1.15738	1.3217		2.43417	11.5336	11.7314
	3		7.25834	2.70066	1.36893		3.23498	2.00521	1.16617		-5.67591	2.49212	0.740657		NaN	NaN	NaN		NaN	NaN	NaN
	3		10.5	6.77945	NaN		4.40827	7.08578			-13.6222	-1.26375	NaN		11.9733	NaN	NaN		2.38986	NaN	NaN
	3		6.85725	6.50847	2.02981		5.94572	10.6862	2.15263		-10.3589	-6.33537	-2.55795		16.1406	-6.07793	3.52615		3.20717	17.8017	10.8736
	3		2.59695	3.43762	4.08311		4.82534	3.10296	2.24993		-4.4081	1.99504	-4.18867		7.54968	0.0033705	1.72948		7.1309	13.1851	9.79525
	median		4.31582	3.23155	2.1109		3.19076	2.90576	2.01475		-3.75866	-0.371666	-0.60919		7.54968	-2.86986	1.3217		4.36192	11.5336	10.8736
	standard deviation		2.39853	1.68653	2.93649		1.51411	2.41017	1.08473		5.07949	3.78138	4.2523		8.6849	3.42538	5.90712		4.52968	3.51703	4.63498

## Sheet: ab-adduction task
			dRMS [deg]		dRMS - offset [deg]		offset [deg]		dROM [deg]		ROM OT [deg]
Plane of movement	subject		MCP		MCP		MCP		MCP		MCP
Sagittal	1		3.74425		4.28574		-4.46098		NaN		NaN
	2		9.20884		1.11386		9.7456		1.02406		10.1066
	2		2.63006		0.715344		2.46171		0.20574		12.4137
	3		3.19473		1.47503		-2.17616		1.43649		12.8172
	3		4.62587		1.99893		-2.85845		2.78321		14.6001
	median		3.74425		1.47503		-2.17616		1.23027		12.6154
	standard deviation		2.63615		1.40552		5.75267		1.0765		1.84806
Frontal	1		3.29518		2.58246		-0.889925		2.35238		24.7039
	2		3.74799		3.10534		-1.52441		2.72295		26.2104
	2		8.99395		1.21655		9.10527		2.35204		26.3844
	3		1.97469		3.31729		2.2174		4.46977		20.7183
	3		2.63069		2.13993		3.01922		5.30124		21.0596
	median		3.29518		2.58246		2.2174		2.72295		24.7039
	standard deviation		2.80152		0.83879		4.23087		1.36064		2.75281
Transversal	1		14.2359		8.35213		-7.19082		15.068		1.57552
	2		9.72924		2.36488		-10.1946		3.25822		12.0888
	2		7.15463		6.68111		-2.85492		12.5293		3.18714
	3		10.5961		10.2987		-0.36763		11.1343		3.032
	3		11.5406		10.0712		-1.82178		10.9487		3.09413
	median		10.5961		8.35213		-2.85492		11.1343		3.09413
	standard deviation		2.58459		3.24791		4.08117		4.41569		4.24122

## Sheet: circular pointing task
			dRMS [deg]		dRMS - offset [deg]		offset [deg]		dROM [deg]		ROM OT [deg]
Plane of movement	subject		MCP		MCP		MCP		MCP		MCP
Sagittal	1		5.46944		4.617		1.37529		13.5961		63.1816
	1		7.39304		6.13882		2.83483		16.5166		70.5053
	1		10.3457		7.13773		5.76057		15.6956		82.7565
	2		7.54986		7.75902		-0.331726		NaN		48.9409
	2		5.79658		5.29303		0.699236		5.27476		46.6739
	2		5.09892		5.86518		-1.12255		7.63206		48.786
	3		8.12213		9.22072		1.43638		-1.67969		63.2527
	3		4.69937		3.43741		-5.55518		0.134122		58.9955
	median		6.59481		6.002		1.03726		7.63206		61.0886
	standard deviation		1.90177		1.83259		3.26556		7.37121		12.3888
Frontal	1		6.98277		7.64163		-5.45259		4.42505		28.8415
	1		5.86958		7.30748		-4.03272		3.29206		33.7933
	1		4.18		4.35643		-1.75205		3.66908		25.865
	2		10.7288		5.12059		-10.519		8.23287		24.8121
	2		10.5285		5.25393		-13.6872		8.55818		26.3664
	2		11.6522		5.33497		-14.7408		6.91119		25.299
	3		8.06052		8.74981		0.938096		12.2954		31.8711
	3		4.55837		2.48335		-5.355		5.30482		29.023
	median		7.52164		5.29445		-5.4038		6.10801		27.604
	standard deviation		2.90157		2.01504		5.62186		3.04664		3.26343
Transversal	1		4.42078		5.37766		-3.46534		15.5181		3.70484
	1		4.31983		4.20659		2.60539		14.2223		5.40254
	1		4.33167		4.9708		5.14228		13.5294		5.18685
	2		4.94269		6.87064		-4.44804		-9.12529		29.1477
	2		4.66211		8.08732		-7.16283		-6.42166		26.7917
	2		5.49077		8.91211		-7.92363		-9.56943		30.27
	3		12.3413		6.98086		-8.50454		21.2818		4.35039
	3		7.02449		7.66828		0.899671		19.1467		3.90715
	median		4.8024		6.92575		-3.95669		13.8758		5.2947
	standard deviation		2.73867		1.63816		5.16784		13.2705		12.5871

## Sheet: thumb tapping task
Amplitude thumb/index			dRMS [m]		dRMS - offset [m]		offset [m]		dROM [m]		ROM OT [m]
	subject
	1		0.0189822		0.0166421		0.00913044		0.0108091		0.108796
	2		0.0327548		0.0172293		-0.0278573		-0.0457338		0.128668
	2		0.0259388		0.0187457		-0.0179283		0.0174652		0.187539
	3		0.00637154		0.00637154		0		-0.0137864		0.0480088
	3		0.0139123		0.0129671		-0.00504047		0.0433689		0.125661
	3		0.00965912		0.00924537		-0.00279671		0.0104494		0.0963363
	3		0.0158013		0.0155779		-0.00264761		0.00731715		0.0830541
	median		0.0158013		0.0155779		-0.00279671		0.0104494		0.108796
	standard deviation		0.00919309		0.00454741		0.0122719		0.0277473		0.0435009
in [mm]	median		15.8013		15.5779		-2.79671		10.4494		108.796
	standard deviation		9.19309		4.54741		12.2719		27.7473		43.5009
