# Supplementary material for: Measuring 3D Hand and Finger Kinematics—A Comparison between Inertial Sensing and an Opto-Electronic Marker System
Source: PLoS One. 2016 Nov 3;11(11):e0164889. doi: 10.1371/journal.pone.0164889 (PMC5094774; doi:10.1371/journal.pone.0164889)
Supplement: S2 File — (XLSX) [file pone.0164889.s002.xlsx]

## Sheet: Blad1
		Marker movement [mm]		Mean effect marker movement on segment [deg]
Task	subject
Index flexion	1	1.65797		2.51565
	1	1.37212		1.33276
	1	1.48285		2.79569
	1	1.48913		2.38874
	1	1.8267		4.30796
	1	1.08448		7.08109
	1	0.937459		8.63311
	1	0.798933		6.9056
	1	1.91298		3.10892
	1	1.88982		2.22257
	1	1.37318		4.37428
	1	2.7019		3.67049
	1	2.62169		4.16133
	1	2.36785		3.8521
	2	1.75253		2.36029
	2	1.51844		1.30678
	2	2.50633		4.7413
	2	2.2745		2.66608
	2	1.89358		3.05826
	2	1.14034		3.34676
	2	1.47192		3.46786
	2	1.4665		3.21394
	2	0.99892		1.82473
	2	1.11419		2.72032
	3	1.51597		2.4555
	3	1.50152		0.653076
	3	1.77448		5.10469
	3	1.86821		5.48025
	3	3.1383		4.92913
	3	2.47085		3.44722
	3	3.5492		2.17884
	3	3.18954		10.1231
	3	5.14633		2.63211
	3	4.79265		2.5615
	3	5.16794		2.74173
	median	1.77448		3.10892
	standard deviation	1.12255		2.019
Fast	1	2.4673		10.1239
	1	2.18486		20.2702
	1	1.89748		9.33665
	1	1.4959		11.6793
	1	4.04301		5.2691
	1	3.31423		6.56974
	2	1.55958		6.70076
	2	2.62847		3.53103
	2	1.76637		3.64337
	2	2.46896		19.7271
	2	2.46182		13.8608
	3	3.63583		4.85429
	3	3.1194		4.10505
	3	3.88581		7.18922
	3	3.56371		14.4753
	3	5.31036		16.7146
	3	3.37893		18.4813
	3	3.82249		4.47859
	3	4.4911		3.84427
	3	5.71819		7.98908
	median	3.21681		7.58915
	standard deviation	1.18529		5.71977
Ab/adduction	1	1.15528		2.06114
	2	1.56413		2.30065
	2	1.46666		2.12012
	3	1.20723		1.92124
	3	0.800236		1.60604
	median	1.20723		2.06114
	standard deviation	0.299195		0.259782
Circular pointing	1	8.40211		6.89802
	1	5.58031		10.7312
	1	8.02335		11.7305
	2	3.64987		2.9106
	2	5.35464		3.0338
	2	5.15229		4.3267
	3	1.05239		4.51755
	3	1.22145		4.32325
	median	5.25346		4.42213
	standard deviation	2.74067		3.42582
