# Supplementary material for: Measuring 3D Hand and Finger Kinematics—A Comparison between Inertial Sensing and an Opto-Electronic Marker System
Source: PLoS One. 2016 Nov 3;11(11):e0164889. doi: 10.1371/journal.pone.0164889 (PMC5094774; doi:10.1371/journal.pone.0164889)
Supplement: S3 File — (XLSX) [file pone.0164889.s003.xlsx]

## Sheet: Blad1
		dRMS per segment [rad/s]				dRMS [%max] per segment
Task	subject	proximal	medial	distal		proximal	medial	distal	average
Flexion	1	0.163088	0.210378	0.276083		1.86062	1.47085	1.74094	1.6908
	1	0.104181	0.142051	0.184531		6.14478	2.24961	1.56589	3.32009
	1	0.112773	0.152648	0.198655		4.32322	1.90649	1.48606	2.57192
	1	0.0884019	0.176672	0.277665		2.6574	2.41182	2.05763	2.37562
	1	0.218771	0.289166	0.365226		2.49081	1.83666	2.17919	2.16889
	1	0.165768	0.235743	0.292897		2.16493	1.42978	1.67527	1.75666
	1	0.335971	0.37218	0.40502		2.99086	2.16174	1.98891	2.3805
	1	0.334662	0.364834	0.400052		2.43109	2.06705	2.0864	2.19485
	1	0.111723	0.188686	0.294801		1.47915	1.35926	1.38375	1.40739
	1	0.102641	0.183417	0.267808		1.55417	1.40383	1.44853	1.46885
	1	0.0982592	0.17669	0.25672		1.55559	1.27249	1.14822	1.32543
	1	0.27604	0.533515	0.52107		3.35864	2.69253	3.20436	3.08518
	1	0.204117	0.755276	1.2054		2.69764	2.76779	2.55137	2.67227
	1	0.307824	0.342139	0.356817		3.23811	1.95726	1.8196	2.33832
	1	0.261303	0.269815	0.289312		3.21628	3.11731	3.16624	3.16661
	1	0.214703	0.223998	0.233047		2.40391	2.32608	2.31643	2.34881
	1	0.312558	0.322065	0.339727		4.15821	3.77794	3.629	3.85505
	1	0.069688	0.0806766	0.0918873		6.19748	2.61359	1.73492	3.51533
	1	0.0776531	0.0899668	0.102471		4.0297	2.25005	1.69541	2.65839
	1	0.0757762	0.0863172	0.106713		2.54742	2.40271	1.64802	2.19938
	1	0.233166	0.272144	0.307189		3.44857	3.39188	3.32246	3.38764
	1	0.19538	0.207947	0.227357		3.12461	3.01729	2.98658	3.04283
	1	0.173765	0.180041	0.188879		2.8649	2.60772	2.37493	2.61585
	2	0.261836	0.287241	0.326381		1.65301	1.70235	1.74757	1.70098
	2	0.222214	0.23933	0.286412		2.24683	2.05688	2.32278	2.20883
	2	0.252258	0.263633	0.286226		2.36535	2.10578	2.27466	2.2486
	2	0.0898345	0.131796	0.285887		3.34801	1.53621	1.91033	2.26485
	2	0.0822119	0.166231	0.297842		2.86581	2.37411	2.35046	2.53012
	2	0.232524	0.255502	0.279069		2.5019	2.04114	1.89244	2.14516
	2	0.230667	0.23582	0.26968		2.58956	1.59259	1.48385	1.88867
	2	0.208197	0.214364	0.21826		2.42218	1.70092	1.49138	1.87149
	2	0.273062	0.42133	0.462813		2.07334	2.19145	1.96117	2.07532
	2	0.183819	0.313788	0.359936		2.23996	1.89666	1.81523	1.98395
	2	0.448163	0.547452	0.607994		2.98585	2.90714	2.60829	2.83376
	2	0.191095	0.199481	0.206756		4.07465	4.59406	4.61973	4.42948
	2	0.183789	0.184062	0.193531		3.67483	3.47947	3.43847	3.53092
	2	0.0748723	0.166181	0.209714		5.46553	2.48098	2.39737	3.44796
	2	0.12212	0.119162	0.130157		5.32608	4.51785	4.21996	4.68797
	3	0.211713	0.347855	0.320529		5.00662	6.26632	3.45016	4.9077
	3	0.505397	0.605785	0.543474		1.86563	1.98123	1.96399	1.93695
	3	0.159018	0.34629	0.344787		5.61801	2.89126	2.35505	3.62144
	3	0.209529	0.241819	0.261992		2.78943	3.29385	2.60227	2.89518
	3	0.276723	0.300307	0.30884		6.94311	7.20666	4.18603	6.11193
	3	0.7109	0.883618	0.776681		1.76529	2.15125	1.8883	1.93495
	3	0.796576	0.853959	0.901664		1.81958	1.84388	1.82404	1.82916
	3	0.190018	0.218346	0.251593		5.83108	3.28323	2.39412	3.83615
	3	0.225955	0.258999	0.286465		6.28706	4.97673	2.81835	4.69404
	3	0.234922	0.259455	0.313618		4.05952	3.79934	3.78004	3.87963
	3	0.0735003	0.114033	0.193542		1.80658	1.31181	1.47481	1.53107
	3	0.0635314	0.109267	0.176718		1.15884	1.18138	1.19195	1.17739
	3	0.0699492	0.10908	0.176822		1.64939	1.02171	1.44088	1.37066
	3	0.0999285	0.128657	0.150733		7.11006	7.67369	4.41085	6.3982
	3	0.121991	0.13618	0.145904		6.42017	7.23668	5.87348	6.51011
	3	0.163255	0.181865	0.201352		7.14101	8.09811	5.3619	6.86701
	median	0.193238	0.229871	0.282478		2.86535	2.28807	2.1328	2.45531
	standard deviation	0.211255	0.272171	0.314161		3.40819	2.84975	2.45852	2.90549
Fast	1	0.354714	0.502704	0.686739		2.4718	1.62563	1.72164	1.93969
	1	0.505464	0.518457	0.607682		2.59867	1.60359	1.53321	1.91182
	1	1.41669	1.46444	1.61997		4.18789	4.27425	4.66804	4.37673
	1	1.67196	1.59263	1.78334		5.38402	4.48803	4.27427	4.71544
	1	0.897808	0.879096	0.926606		3.27567	2.64292	2.61193	2.84351
	1	1.05122	1.08176	1.16612		3.30834	2.94514	3.08612	3.1132
	2	0.37037	0.473363	0.605696		2.94786	1.75908	1.79765	2.1682
	2	0.327588	0.518974	0.668725		2.32237	1.97082	2.04972	2.1143
	2	1.3808	1.43813	1.63055		6.47952	6.59785	6.73006	6.60247
	2	3.34225	3.3553	3.42508		17.5918	14.3653	11.7365	14.5645
	2	3.36423	3.37463	3.45492		17.812	15.1621	12.6866	15.2202
	3	0.461959	0.529642	0.704931		2.30527	1.60648	1.77056	1.8941
	3	0.325739	0.474112	0.683312		1.70249	1.45166	1.76664	1.64026
	3	0.587375	0.601744	0.654898		3.17585	1.99714	1.61824	2.26374
	3	1.35993	1.62973	2.07433		3.01986	3.38879	4.31212	3.57359
	3	1.13004	1.23869	1.33277		4.03872	4.41095	4.31604	4.25523
	3	0.680015	0.76656	0.908054		3.41996	2.33561	2.30422	2.68659
	3	0.702421	0.910911	1.39922		3.48563	2.58223	2.91216	2.99334
	3	2.4245	2.46749	2.77532		17.1891	10.8031	6.47743	11.4899
	3	2.3181	2.32648	2.45977		17.1519	11.7329	10.4041	13.0963
	3	2.21452	2.26732	3.88846		20.8855	8.291	2.15481	10.4438
	median	1.05122	1.08176	1.33277		3.41996	2.94514	2.91216	3.1132
	standard deviation	0.954232	0.92276	1.04474		6.55555	4.39032	3.42149	4.5626
Ab/adduction	1	0.115939	0.126074	0.126349		2.23812	2.3939	2.44025	2.35742
	2	0.238606	0.404115	0.46208		3.63229	2.87394	2.65436	3.05353
	2	0.180228	0.191063	0.183913		2.82767	3.00773	2.91865	2.91802
	2	0.134713	0.146613	0.146461		2.48179	2.69807	2.77162	2.65049
	3	0.115353	0.14726	0.176579		2.56164	3.1814	3.74345	3.16216
	3	0.106939	0.139597	0.164523		2.41631	3.06768	3.47674	2.98691
	median	0.125326	0.146936	0.170551		2.52171	2.94084	2.84513	2.95246
	standard deviation	0.0513848	0.105968	0.125255		0.499149	0.286797	0.504293	0.298175
Circular pointing	1	0.725394	0.743303	0.770896		7.0092	6.16505	5.71892	6.29772
	1	1.24909	1.27352	1.2959		11.1348	9.38222	8.5625	9.69316
	1	1.2801	1.27191	1.31751		8.12323	7.4832	7.74711	7.78452
	2	0.73796	0.718416	0.723977		7.32739	6.88791	6.79514	7.00348
	2	0.541792	0.562485	0.553503		6.77024	6.75207	6.08608	6.53613
	2	0.566806	0.583921	0.572338		7.56035	7.47392	6.62015	7.21814
	3	0.673569	0.711182	0.737861		4.99988	4.47663	4.03851	4.50501
	3	0.556316	0.606275	0.668516		5.79896	5.13359	4.94568	5.29275
	median	0.699481	0.714799	0.730919		7.1683	6.81999	6.35311	6.76981
	standard deviation	0.301761	0.293911	0.303989		1.82629	1.51774	1.45852	1.57734
